# Supplementary material for: Selective dehydration of sorbitol to 1,4-anhydro-d-sorbitol catalyzed by a polymer-supported acid catalyst
Source: Royal Society of Chemistry journal article supplement (doi:10.1039/c5ra01371b), 2015-01-01
Supplement: c5ra01371b1.pdf [file c5ra01371b1.pdf]

## *Supporting information*

### **Selective Dehydration of Sorbitol to 1,4-anhydro-D-sorbitol**

#### **Catalyzed by Polymer-supported Acid Catalyst**

Yuhe Xiu, Angjun Chen, Xuerui Liu, Chen Chen, Jizhong Chen, Li Guo, Ran Zhang, Zhenshan Hou\*

Key Laboratory for Advanced Materials, Research Institute of Industrial Catalysis, East China University of Science and Technology, Shanghai, 200237, P. R. China.

Table 1S. The composition of the polymer catalysts.

| Entry | Catalysts                                           | C% <sup>a</sup> | H% <sup>a</sup> | N% <sup>a</sup> | S% <sup>b</sup> | Si% <sup>b</sup> |
|-------|-----------------------------------------------------|-----------------|-----------------|-----------------|-----------------|------------------|
| 1     | SO <sub>3</sub> H-PS-SO <sub>3</sub> H              | 35.8(34.2)      | 5.4(5.5)        | 6.7(6.8)        | 11.4(11.2)      | 5.0(5.1)         |
| 2     | SO <sub>3</sub> H-PS-SO <sub>3</sub> H <sup>c</sup> | 35.7            | 5.4             | 6.7             | 11.3            | 5.0              |
| 3     | 0.3SO <sub>3</sub> H-PS-0.3SO <sub>3</sub> H        | 43.9(42.7)      | 7.3(7.5)        | 5.6(5.4)        | 4.4(4.6)        | 8.6(8.7)         |
| 4     | 0.6SO <sub>3</sub> H-PS-0.6SO <sub>3</sub> H        | 43.0(43.5)      | 6.6(6.5)        | 5.6(5.7)        | 7.2(7.3)        | 7.1(7.0)         |
| 5     | 2SO <sub>3</sub> H-PS-2SO <sub>3</sub> H            | 41.2(40.8)      | 5.4(5.3)        | 5.7(5.7)        | 12.9(13.1)      | 3.8(3.7)         |
| 6     | 3SO <sub>3</sub> H-PS-3SO <sub>3</sub> H            | 40.4(40.6)      | 5.1(5.4)        | 5.6(5.8)        | 14.5(14.1)      | 2.9(2.8)         |
| 7     | SO <sub>3</sub> H-PS                                | 39.1(39.5)      | 5.5(5.3)        | 5.4(5.5)        | 10.8(11.1)      | 5.6(5.6)         |
| 8     | SO <sub>3</sub> H-PS <sup>c</sup>                   | 40.1            | 5.5             | 5.4             | 6.4             | 5.8              |
| 9     | PS-SO <sub>3</sub> H                                | 31.6(32.2)      | 5.5(5.5)        | 9.2(9.4)        | 10.7(10.9)      | 4.8(4.7)         |
| 10    | PS-SO <sub>3</sub> H <sup>c</sup>                   | 32.6            | 5.6             | 10.2            | 6.4             | 4.9              |

<sup>a</sup>Determined by elemental analysis, <sup>b</sup>Determined by ICP-AES, <sup>c</sup> The catalyst was recycled five times in sorbitol dehydration. The values in the parathesis refer to calculated results.

Table 2S The BET surface area of various catalysts.

| Catalysts                                          | BET surface areas ( $\text{m}^2 \cdot \text{g}^{-1}$ ) |
|----------------------------------------------------|--------------------------------------------------------|
| $\text{SO}_3\text{H-PS-SO}_3\text{H}$              | 29.47                                                  |
| $0.3\text{SO}_3\text{H-PS-}0.3\text{SO}_3\text{H}$ | 25.81                                                  |
| $0.6\text{SO}_3\text{H-PS-}0.6\text{SO}_3\text{H}$ | 27.49                                                  |
| $2\text{SO}_3\text{H-PS-}2\text{SO}_3\text{H}$     | 35.42                                                  |
| $3\text{SO}_3\text{H-PS-}3\text{SO}_3\text{H}$     | 42.85                                                  |
| $\text{SO}_3\text{H-PS}$                           | 28.48                                                  |
| $\text{PS-SO}_3\text{H}$                           | 28.36                                                  |
| Amberlyst-15                                       | 45                                                     |

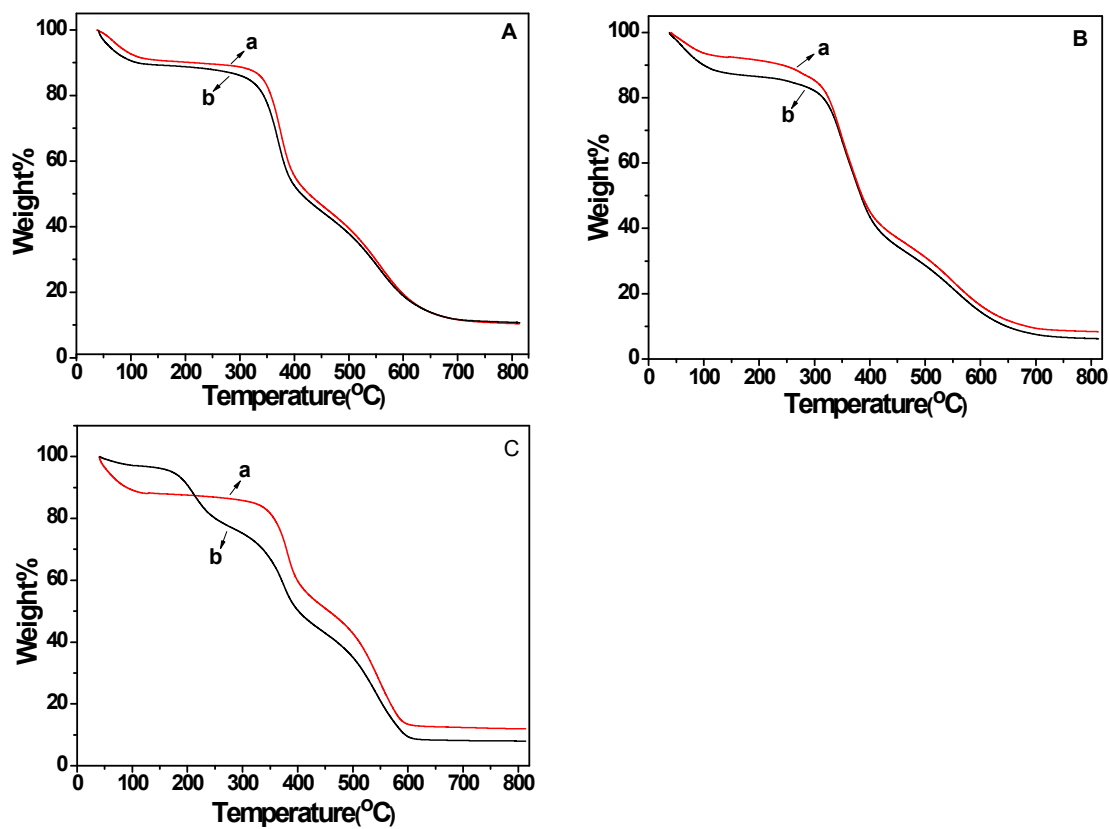

Fig. 1S Thermogravimetric analysis (TGA) curves of polymer-based catalysts. A) SO<sub>3</sub>H-P-SO<sub>3</sub>H, (B) P-SO<sub>3</sub>H and (C) SO<sub>3</sub>H-P. Curve (a) represented fresh catalyst and curve (b) the catalysts after the fifth runs.

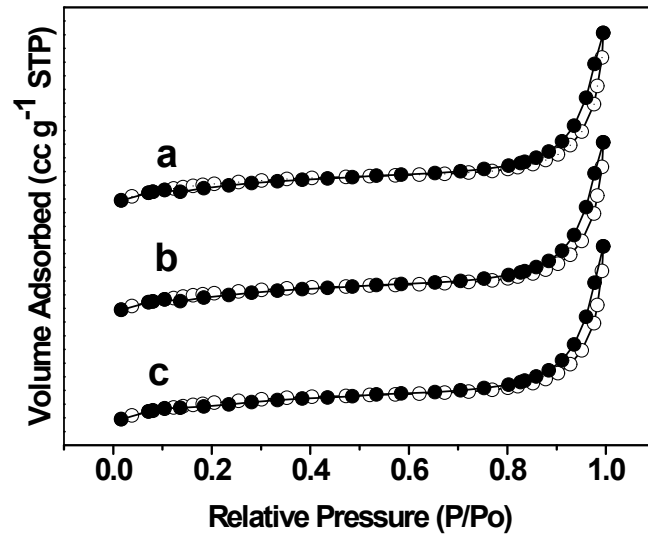

Fig. 2S N<sub>2</sub> sorption isotherms of a) PS-SO<sub>3</sub>H, b) SO<sub>3</sub>H-PS and c) SO<sub>3</sub>H-PS-SO<sub>3</sub>H.

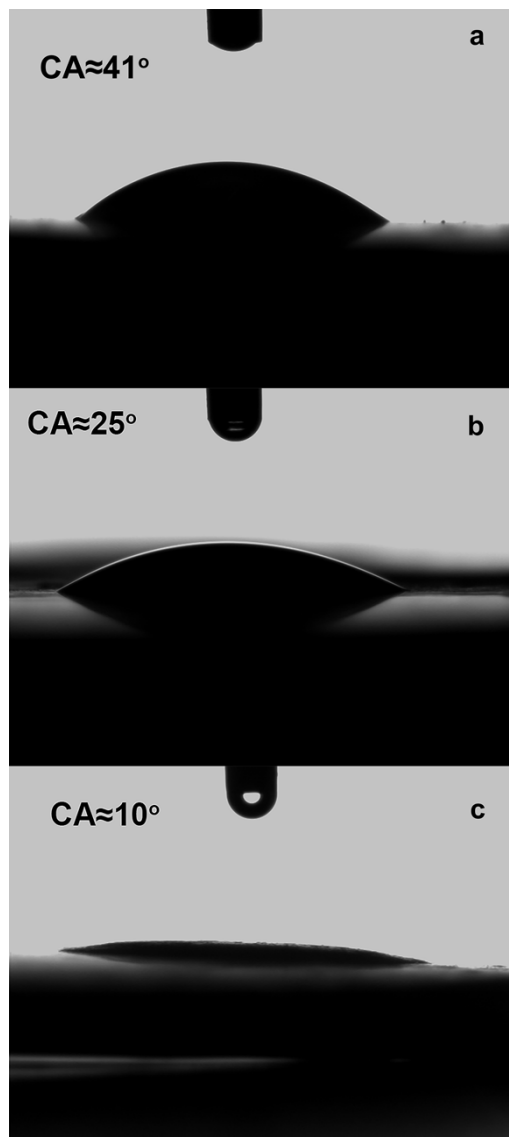

Fig. 3S Water contact angle over a) PS-SO<sub>3</sub>H, b) SO<sub>3</sub>H-PS and c) SO<sub>3</sub>H-PS-SO<sub>3</sub>H. catalyst.

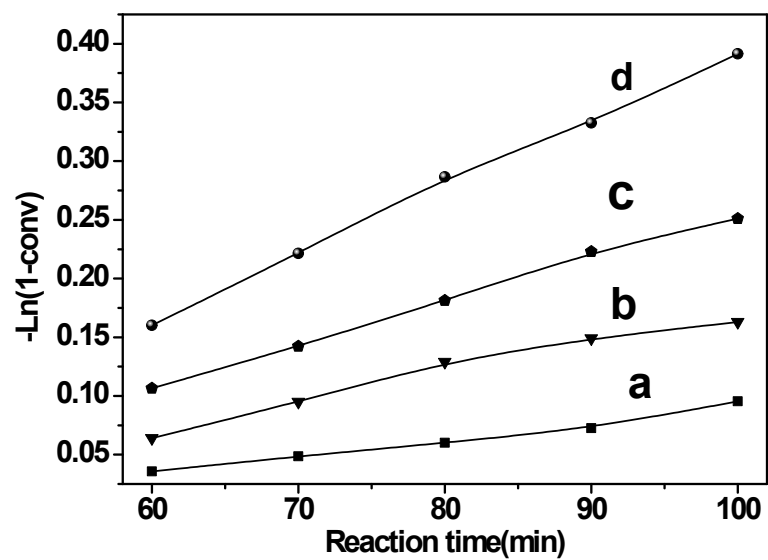

Fig. 4S Time courses of sorbitol dehydration in solvent free system using  $\text{SO}_3\text{H-PS-SO}_3\text{H}$  at various temperatures. (a) 120 °C, (b) 130 °C, (c) 140 °C, (d) 150 °C. Reaction condition: sorbitol (1.65 mmol), catalyst:  $\text{SO}_3\text{H-PS-SO}_3\text{H}$  (acid amounts: 0.27 mmol).

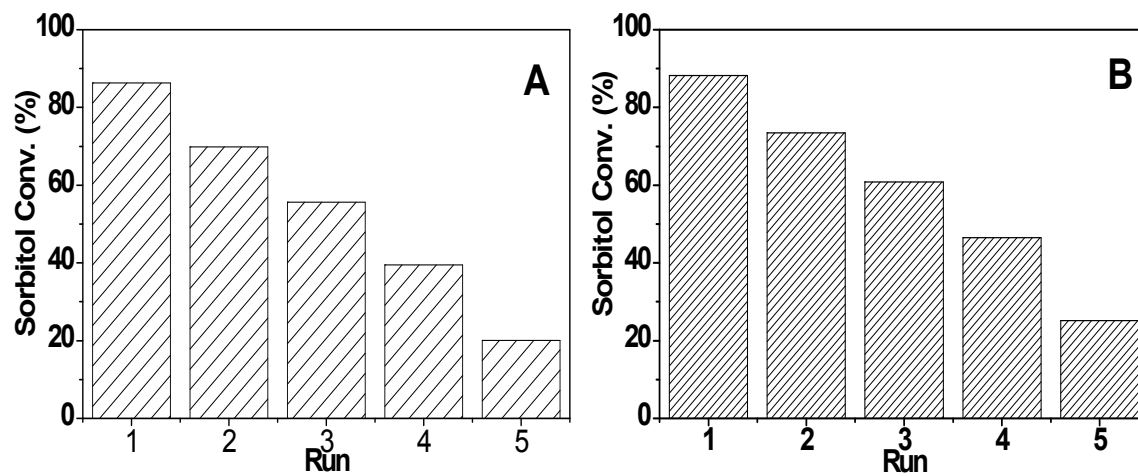

Fig. 5S Recyclability of the catalysts in sorbitol dehydration. A) PS-SO<sub>3</sub>H and B) SO<sub>3</sub>H-PS. Reaction condition: 150 °C, 4 h, 1.65 mmol sorbitol, 0.27 mmol catalyst. The selectivity of 1,4-anhydro-D-sorbitol are both more than 90%.

## Derivatization of sorbitol dehydration products for GC-MS

Derivatization of sorbitol dehydration products was performed in a 25 mL round-bottomed with single neck flask. 0.5 g sorbitol products was introduced into the flask. Subsequently, 1 ml anhydrous pyridine and 1 ml acetic anhydride were added into single-neck flask. Then, the reactor was heated to 90 °C for 20 min. After the reaction, the reactor was cooled to room temperature. The derivatives products were analyzed by GC-MS [Agilent 6890/5973 GC-MS equipped with the HP-5MS column (30 m × 0.25 mm × 0.25 mm)].

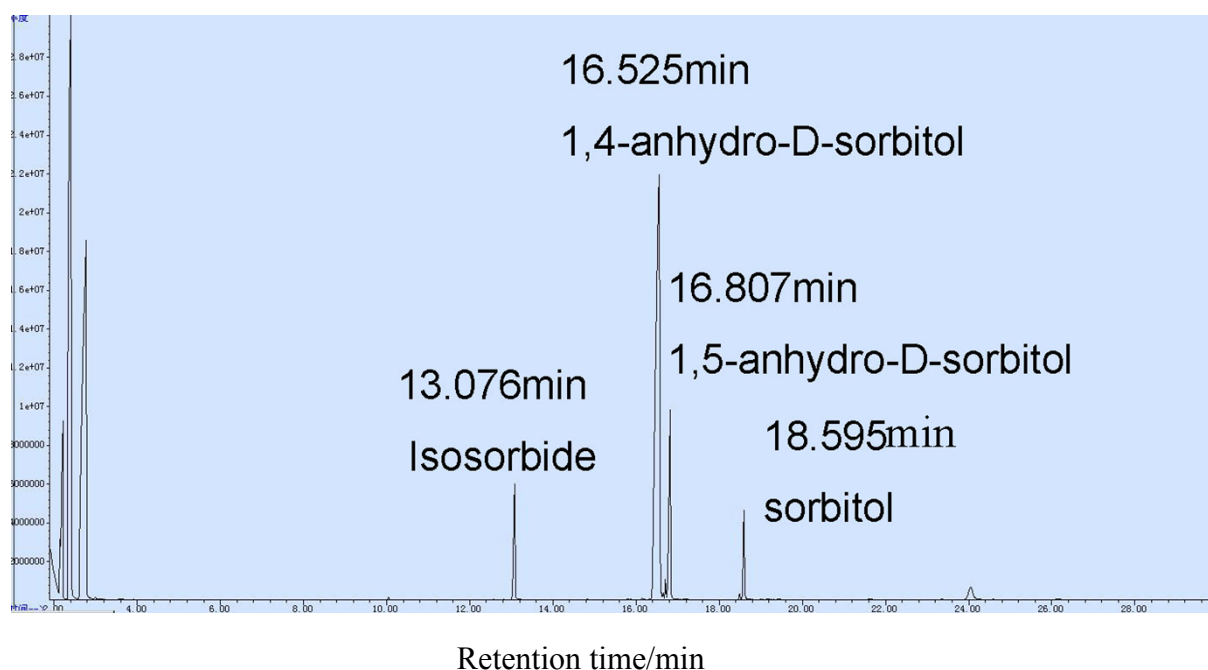

Fig. 6S GC-MS spectrum for an acetylated mixture obtained from sorbitol dehydration (433 K, 4 h)



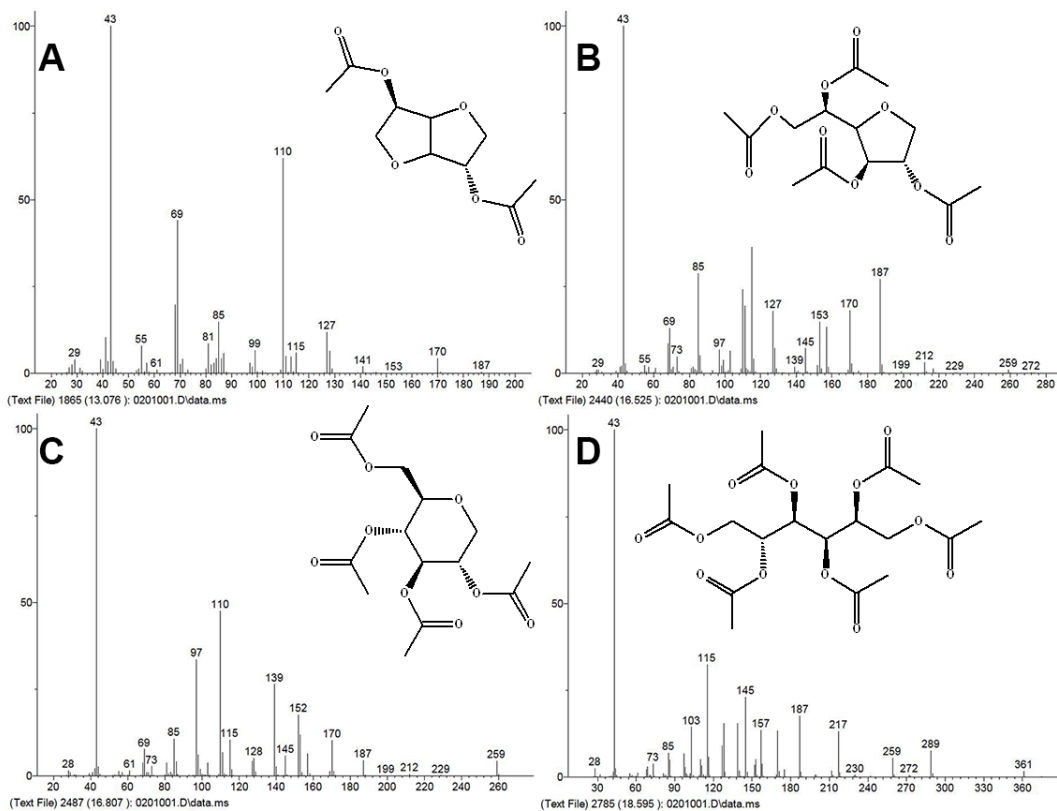

Fig. 7S MS spectra for A) acetylated isororbide, B) acetylated 1,4-anhydro-D-sorbitol, C) acetylated 1,5-anhydro-D-sorbitol and D) acetylated sorbitol obtained from sorbitol dehydration.
